# Supplementary material for: Evaluating antibiotic use and developing a tool to optimize prescribing in a family-centered HIV clinic in Eswatini
Source: PubMed Central journal article supplement (PMC7790297; doi:10.1371/journal.pone.0244247), 2021-01-07
Supplement: pone.0244247.s001.pdf [file pone.0244247.s001.pdf]

**Provider Type** (doctor/nurse/pharmacist):

**Number of years in clinical practice (seeing patients out of school):**

**1. Do you use the Antibiotic Guide?**

Yes

No

**2a. If yes, how often do you use the guide? (please circle)**

Once a week

1-3 times/week

3-5 times/week

Once/day

Several times a day

**2b. If not, why not? (please circle, you may circle more than one)**

1. Do not prescribe antibiotics often/check prescriptions often
2. Did not find it useful/applicable
3. Did not need it (already know antibiotic dosages well)
4. Did not know the guide existed
5. I have another reference I use instead
6. Other \_\_\_\_\_

**3. What is useful/not useful about the antibiotic guide?**

**4. What would you change about the guide?**

**5. Which types of diseases did you use the guide most often for? (please circle, you may circle more than one)**

Skin/soft tissue infection

Animal bites

Ear/nose/throat infections

Urinary tract infections

Pneumonia

Diarrhea

Genital ulcers

Herpes zoster

Sexually transmitted infections

Other \_\_\_\_\_

**6. What types of antibiotics/antivirals did you use the guide the most for? (please circle, you may circle more than one)**

Cloxacillin

Doxycycline

Amoxicillin

Ciprofloxacin

Cotrimoxazole

Erythromycin

Metronidazole

Acyclovir

Azithromycin

Penicillin

Other \_\_\_\_\_

**7. Are there any antibiotic/antivirals or diseases that are not on the guide that you wish were?**

**8. Would you recommend the guide to other clinics?**

Yes                      No

**9. Do you feel the guide has made you better at prescribing antibiotics/antivirals?  
(For pharmacists, do you feel that you have made less phone calls to correct antibiotic prescribing?)**

Yes                      No

**If yes, how has the guide impacted you? (please circle, you may circle more than one)**

More accurate dosing      More accurate antibiotic choice      Using antibiotics less (more stewardship)

Other \_\_\_\_\_

**10. Any other comments?**

**11. For pharmacists, what has the impact been on the number of phone calls you have to make to providers to correct antibiotic choice or antibiotic dosing since the guide was released? (Providers skip this question)**

I make more calls now                      I call about the same amount                      Slight reduction (25%) in calls

50% decrease in calls                      Huge decrease (75%) in calls

Other \_\_\_\_\_
